# Supplementary material for: Ex situ catalytic fast pyrolysis of soy sauce residue with HZSM-5 for co-production of aromatic hydrocarbons and supercapacitor materials
Source: Royal Society of Chemistry journal article supplement (doi:10.1039/d0ra03993d), 2020-01-01
Supplement: d0ra03993d1.pdf [file d0ra03993d1.pdf]

## Supplementary Material

### **Ex-situ catalytic fast pyrolysis of soy sauce residue with HZSM-5 for co-production of aromatic hydrocarbons and supercapacitor**

Kai Li, Dana Bolatibieke, Shi-guan Yang, Bo Wang, Dong-hong Nan, Qiang Lu\*

National Engineering Laboratory for Biomass Power Generation Equipment, North China Electric Power University, Beijing 102206, China

\*Tel.: +86-10-61772030. E-mail: [qianglu@mail.ustc.edu.cn](mailto:qianglu@mail.ustc.edu.cn); [qlu@ncepu.edu.cn](mailto:qlu@ncepu.edu.cn)

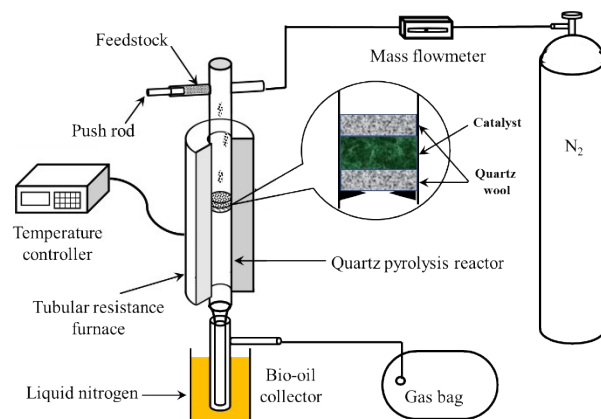

**Fig. S1.** Lab-scale experimental device.

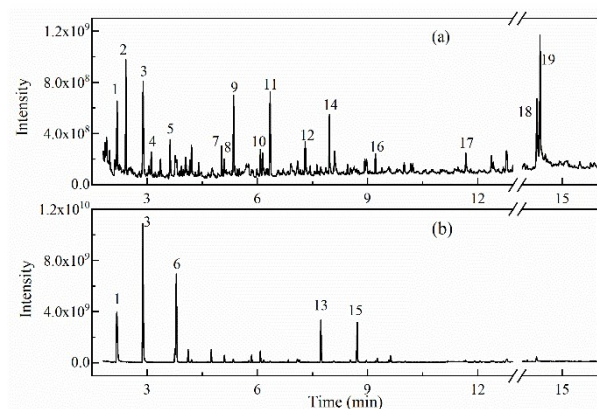

**Fig. S2.** Typical ion chromatograms of SSR with HZ-to-SSR ratio of 0 (a) and 11(b) at 650°C.

- 1.benezene; 2. hydroxyacetone; 3. toluene; 4. pyrrole; 5. methyl pyruvate; 6. p-xylene; 7. cyclooctane-1,2-dione; 8. 2-hexanol; 9. phenol; 10. methylcyclopentenolone; 11. p-cresol; 12. 4-ethylphenol; 13. naphthalene; 14. styrene; 15. methylnaphthalene; 16. indole; 17. levoglucosan; 18. oleic acid; 19. linoleic acid
